# Supplementary material for: Role of Lipids in Spheroidal High Density Lipoproteins
Source: PLOS journal article supplement (doi:10.1371/journal.pcbi.1000964), 2010-10-28
Supplement: S1 (10.1371/journal.pcbi.1000964.s001) [file journal.pcbi.1000964.s001]

## Supporting Information: Figure S1

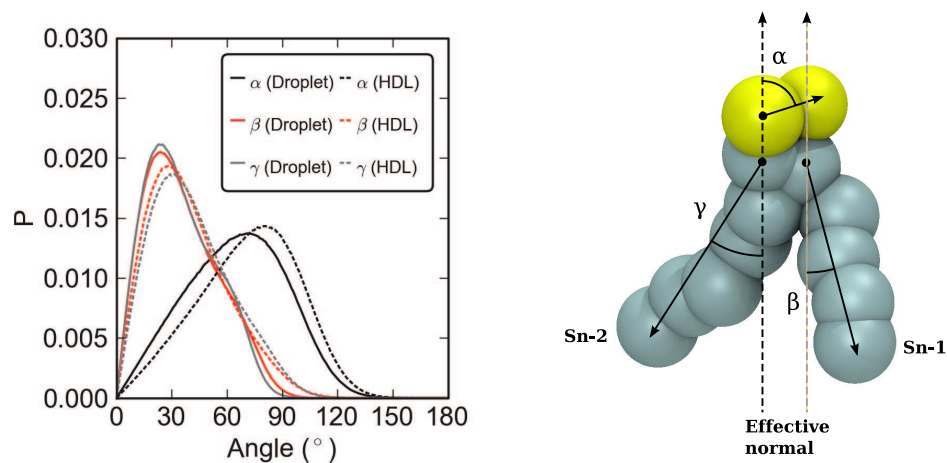

POPC angle distributions (left) showing the orientation of the P-N vector and hydrocarbon chains with respect to the effective normal. The solid lines are for the lipid droplet (without apoA-I) and the dashed lines for full HDL (with apoA-I). The angle  $\alpha$  measures the direction of the P-N vector, and  $\beta$  and  $\gamma$  the tilt angles of the hydrocarbon *sn*-1 and *sn*-2 chains, respectively (right).
