# Supplementary material for: Role of Lipids in Spheroidal High Density Lipoproteins
Source: PLOS journal article supplement (doi:10.1371/journal.pcbi.1000964), 2010-10-28
Supplement: S2 (10.1371/journal.pcbi.1000964.s002) [file journal.pcbi.1000964.s002]

## Supporting Information: Figure S2

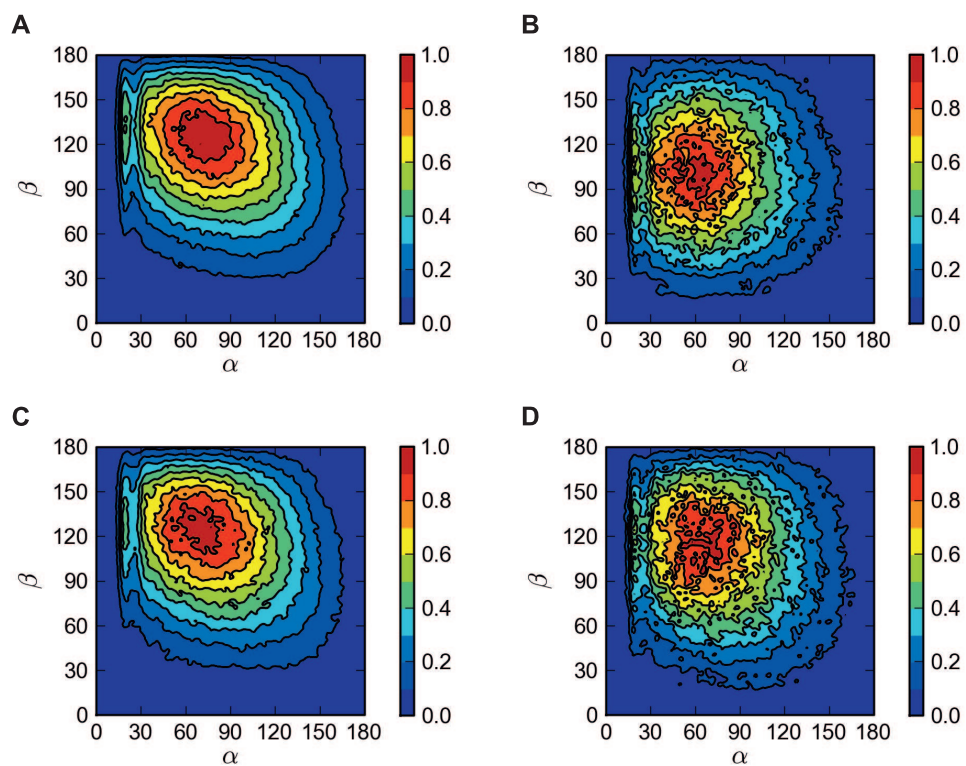

Distributions of TG conformations. The horizontal axis is the angle  $\alpha$  between the hydrocarbon *sn*-1 and *sn*-3 chains. The vertical axis is the angle  $\beta$  between the *sn*-1 and *sn*-2 chains. The left panels (A,C) are for the core of the droplet ( $r < 3$  nm) and the right panels (B,D) for the surface ( $r > 3$  nm). The pictures at the top (A, B) are for the lipid droplet without apoA-I and those at the bottom (C, D) are for the full HDL.
