# Supplementary material for: Role of Lipids in Spheroidal High Density Lipoproteins
Source: PLOS journal article supplement (doi:10.1371/journal.pcbi.1000964), 2010-10-28
Supplement: S4 (10.1371/journal.pcbi.1000964.s004) [file journal.pcbi.1000964.s004]

## Supporting Information: Figure S4

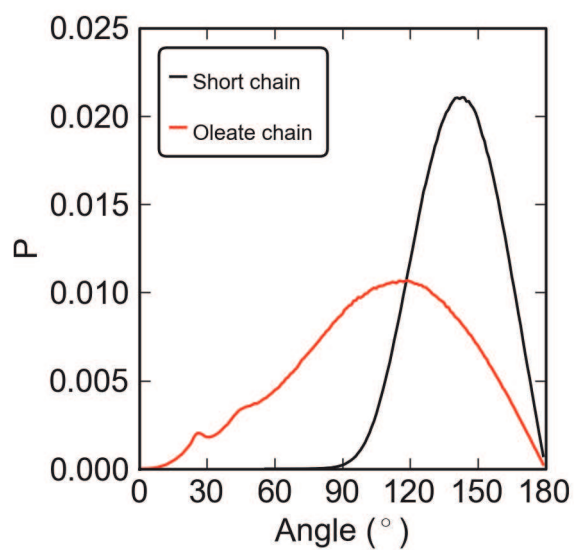

Angle distributions describing cholesteryl oleate conformations. Both the short acyl chain angle and the oleate tail angle are computed with respect to the ring structure director.
